# Supplementary material for: Chemical Composition of Green Pea (Pisum sativum L.) Pods Extracts and Their Potential Exploitation as Ingredients in Nutraceutical Formulations
Source: MDPI journal article supplement (doi:10.3390/antiox11010105), 2021-12-31
Supplement: s1 [file s1]

## Supplementary Materials:

**Table S1.** Spectrometric parameters of the studied analytes.

| Compound                  | RT<br>(min) | Adduct<br>Ion | Chemical<br>Formula                             | Theoretical<br>Mass (m/z) | Measured<br>Mass (m/z) | Accuracy<br>( $\Delta$ mg/kg) | LOD<br>(mg/kg) | LOQ<br>(mg/kg) |
|---------------------------|-------------|---------------|-------------------------------------------------|---------------------------|------------------------|-------------------------------|----------------|----------------|
| Quinic acid               | 0.31        | [M-H]-        | C <sub>7</sub> H <sub>12</sub> O <sub>6</sub>   | 191.05531                 | 191.05611              | 4.18727                       | 0.019          | 0.057          |
| Gallic acid               | 0.82        | [M-H]-        | C <sub>7</sub> H <sub>6</sub> O <sub>5</sub>    | 169.01425                 | 169.01490              | 3.84583                       | 0.039          | 0.117          |
| Protocatechuic acid       | 1.57        | [M-H]-        | C <sub>7</sub> H <sub>6</sub> O <sub>4</sub>    | 153.01930                 | 153.01857              | -4.77064                      | 0.019          | 0.057          |
| Epicatechin               | 3.09        | [M-H]-        | C <sub>15</sub> H <sub>14</sub> O <sub>7</sub>  | 289.07176                 | 289.07202              | 0.89943                       | 0.019          | 0.057          |
| 5-caffeoylquinic acid     | 3.18        | [M-H]-        | C <sub>16</sub> H <sub>18</sub> O <sub>9</sub>  | 353.08780                 | 353.08798              | 0.50979                       | 0.019          | 0.057          |
| Catechin                  | 3.27        | [M-H]-        | C <sub>15</sub> H <sub>14</sub> O <sub>6</sub>  | 289.07175                 | 289.07205              | 1.03780                       | 0.039          | 0.117          |
| <i>p</i> -Coumaric acid   | 3.37        | [M-H]-        | C <sub>9</sub> H <sub>8</sub> O <sub>3</sub>    | 163.04001                 | 163.03937              | -3.92542                      | 0.019          | 0.057          |
| Ferulic acid              | 3.46        | [M-H]-        | C <sub>10</sub> H <sub>10</sub> O <sub>4</sub>  | 193.05063                 | 193.05016              | -2.43459                      | 0.039          | 0.117          |
| Genistein                 | 3.49        | [M-H]-        | C <sub>15</sub> H <sub>10</sub> O <sub>5</sub>  | 269.04554                 | 269.04562              | 0.29735                       | 0.019          | 0.057          |
| Naringin                  | 3.56        | [M-H]-        | C <sub>27</sub> H <sub>32</sub> O <sub>14</sub> | 579.17193                 | 579.17212              | 0.32805                       | 0.019          | 0.057          |
| Rutin                     | 3.60        | [M-H]-        | C <sub>27</sub> H <sub>30</sub> O <sub>16</sub> | 609.14611                 | 609.14673              | 1.01782                       | 0.019          | 0.057          |
| Quercetin 3 galattoside   | 3.60        | [M-H]-        | C <sub>21</sub> H <sub>20</sub> O <sub>12</sub> | 463.08820                 | 463.08817              | -0.06478                      | 0.039          | 0.117          |
| Rosamarinic acid          | 3.62        | [M-H]-        | C <sub>18</sub> H <sub>16</sub> O <sub>8</sub>  | 359.07724                 | 359.07697              | -0.75193                      | 0.019          | 0.057          |
| Kaempferol 3 glucoside    | 3.63        | [M-H]-        | C <sub>21</sub> H <sub>20</sub> O <sub>11</sub> | 447.09195                 | 447.09329              | 2.99715                       | 0.019          | 0.057          |
| Apigenin                  | 3.67        | [M-H]-        | C <sub>15</sub> H <sub>10</sub> O <sub>5</sub>  | 269.04555                 | 269.04556              | 0.03717                       | 0.039          | 0.117          |
| Apigenin-7-O-glucoside    | 3.68        | [M-H]-        | C <sub>21</sub> H <sub>20</sub> O <sub>10</sub> | 431.09837                 | 431.09875              | -1.07788                      | 0.019          | 0.057          |
| Diosmin                   | 3.69        | [M-H]-        | C <sub>28</sub> H <sub>31</sub> O <sub>15</sub> | 607.16684                 | 607.16534              | -2.47049                      | 0.019          | 0.057          |
| Isorhamnetin 3 rutinoside | 3.71        | [M-H]-        | C <sub>28</sub> H <sub>32</sub> O <sub>16</sub> | 623.16176                 | 623.16174              | -0.03209                      | 0.019          | 0.057          |
| Myricetin                 | 3.73        | [M-H]-        | C <sub>14</sub> H <sub>10</sub> O <sub>8</sub>  | 317.03029                 | 317.02924              | -3.31199                      | 0.019          | 0.057          |
| Daidzein                  | 3.76        | [M-H]-        | C <sub>15</sub> H <sub>10</sub> O <sub>4</sub>  | 253.05063                 | 253.05035              | -1.10650                      | 0.019          | 0.057          |
| Hesperidin                | 3.79        | [M-H]-        | C <sub>27</sub> H <sub>30</sub> O <sub>16</sub> | 609.14611                 | 609.14612              | 0.01642                       | 0.019          | 0.057          |
| Quercetin                 | 3.87        | [M-H]-        | C <sub>15</sub> H <sub>10</sub> O <sub>7</sub>  | 301.03538                 | 301.03508              | -0.99656                      | 0.019          | 0.057          |
| Naringenin                | 3.91        | [M-H]-        | C <sub>15</sub> H <sub>12</sub> O <sub>5</sub>  | 271.06120                 | 271.06110              | -0.36892                      | 0.019          | 0.057          |
| Luteolin                  | 3.95        | [M-H]-        | C <sub>15</sub> H <sub>10</sub> O <sub>6</sub>  | 285.04046                 | 285.04086              | 1.40331                       | 0.039          | 0.117          |

Abbreviations: LOD: limit of detection; LOQ: limit of quantification.

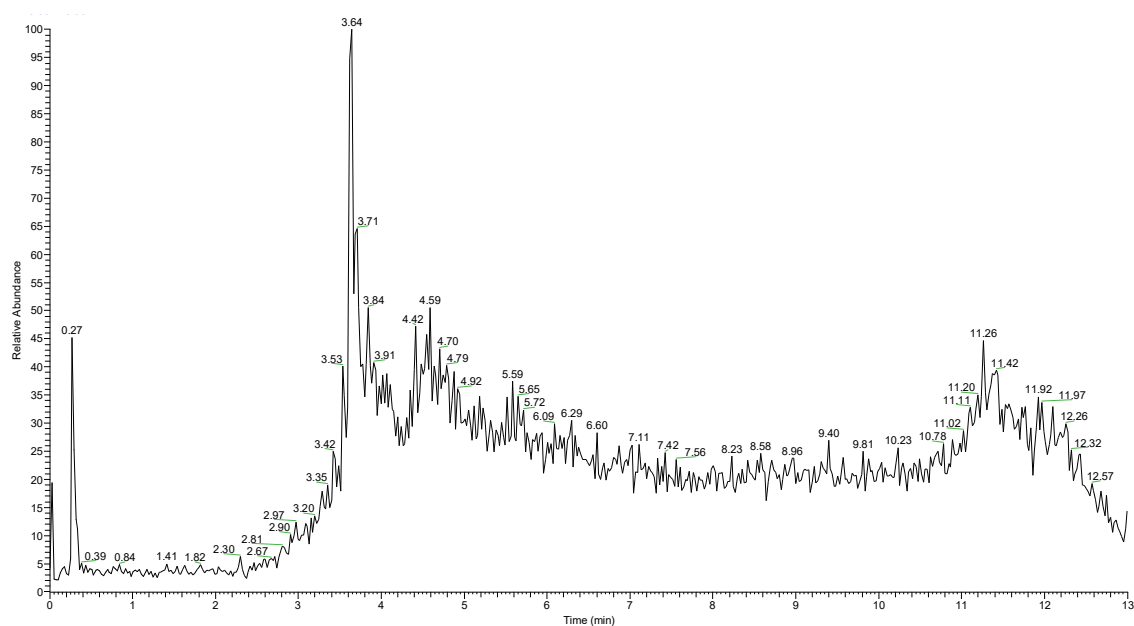

**Figure S1.** Total Ion Chromatogram (TIC) obtained through UHPLC-Q-Orbitrap HRMS analysis

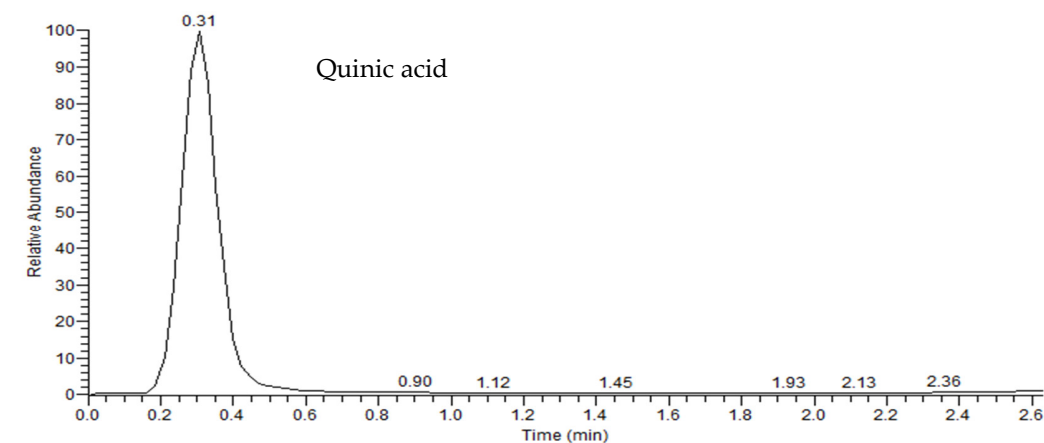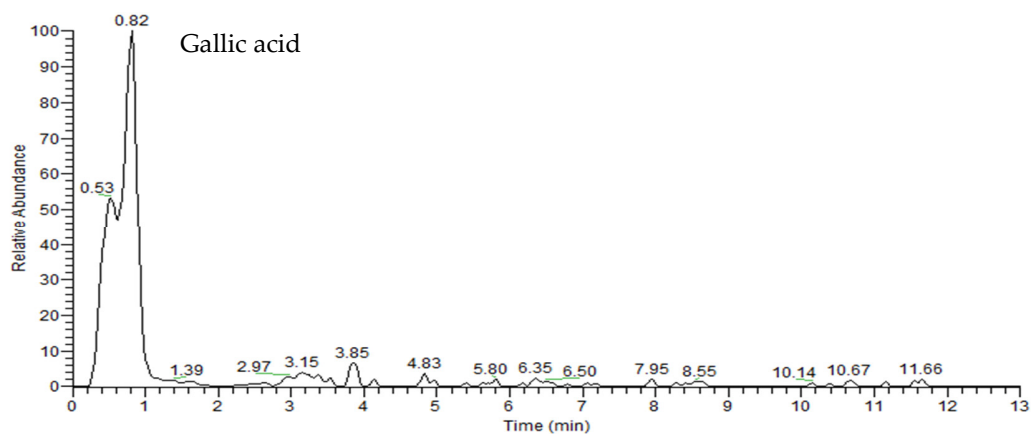

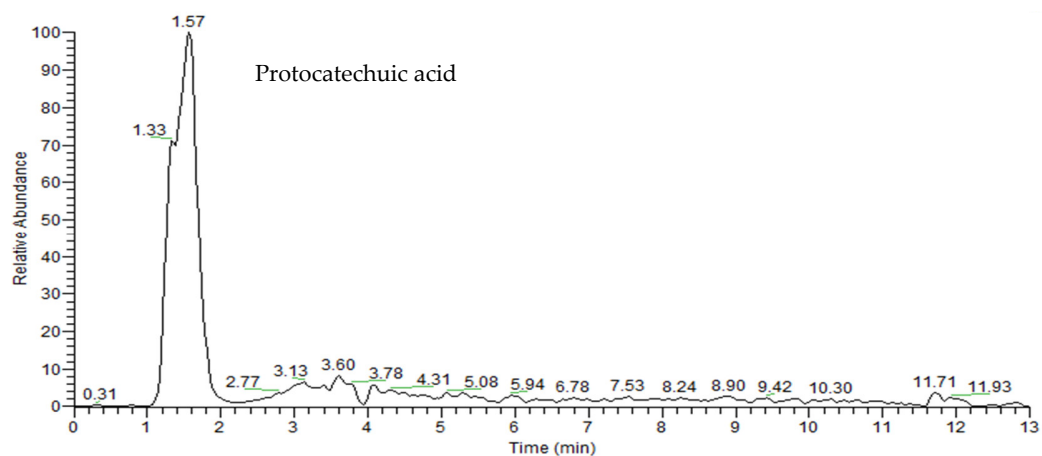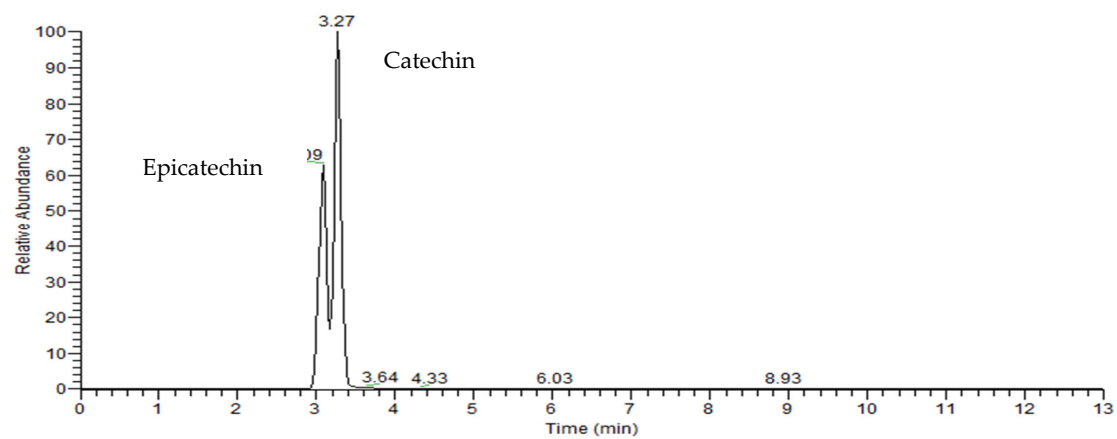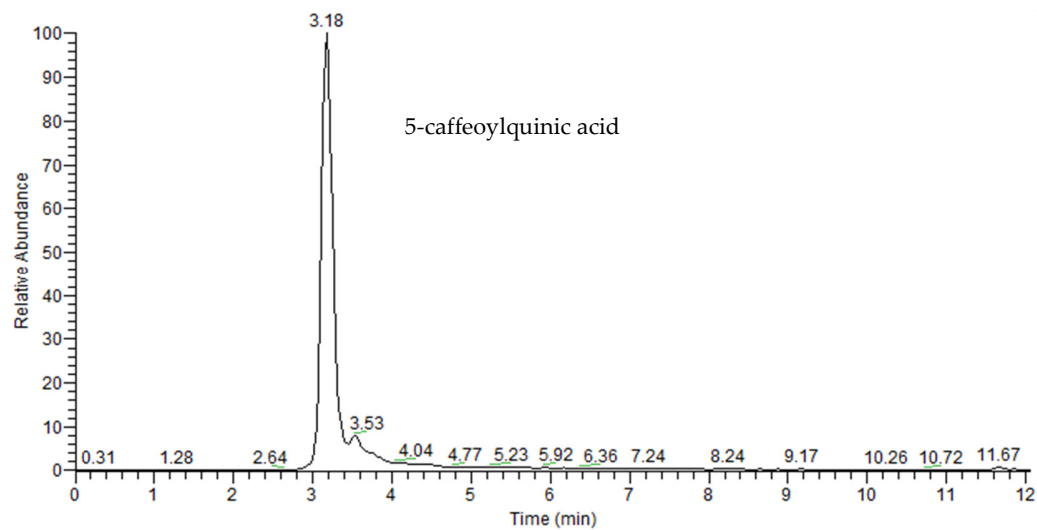

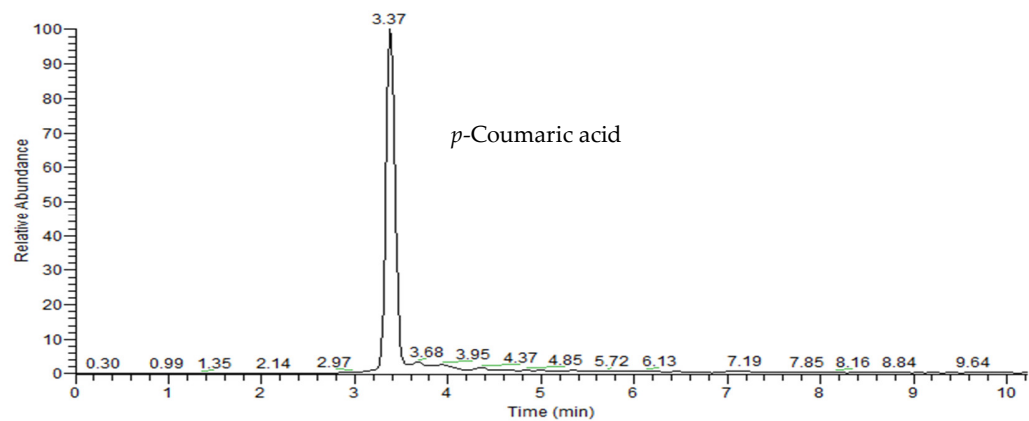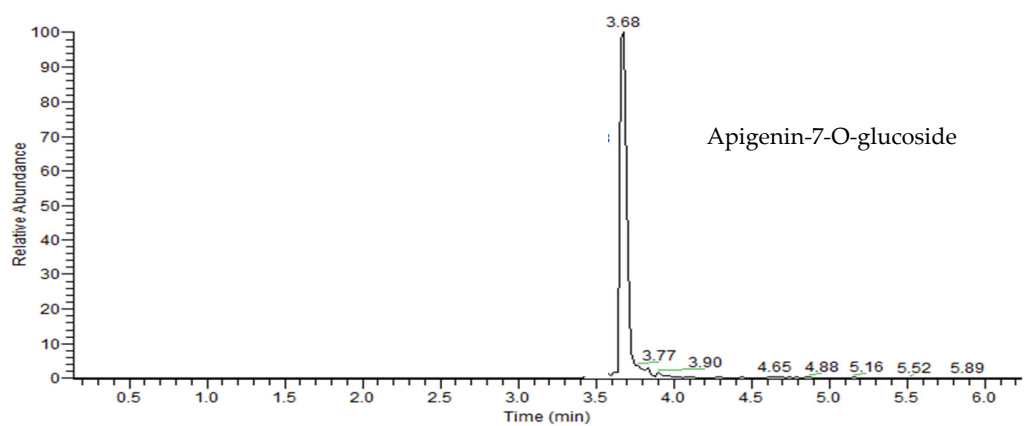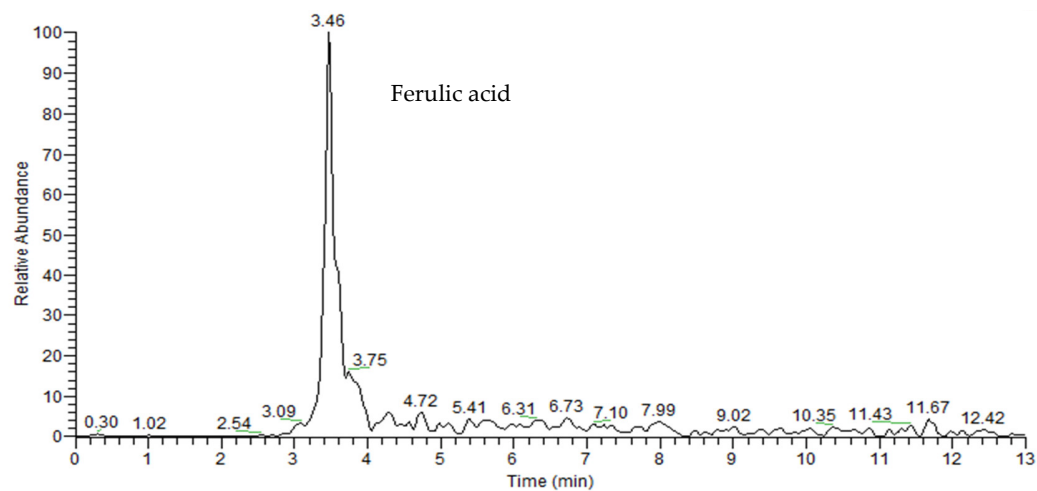

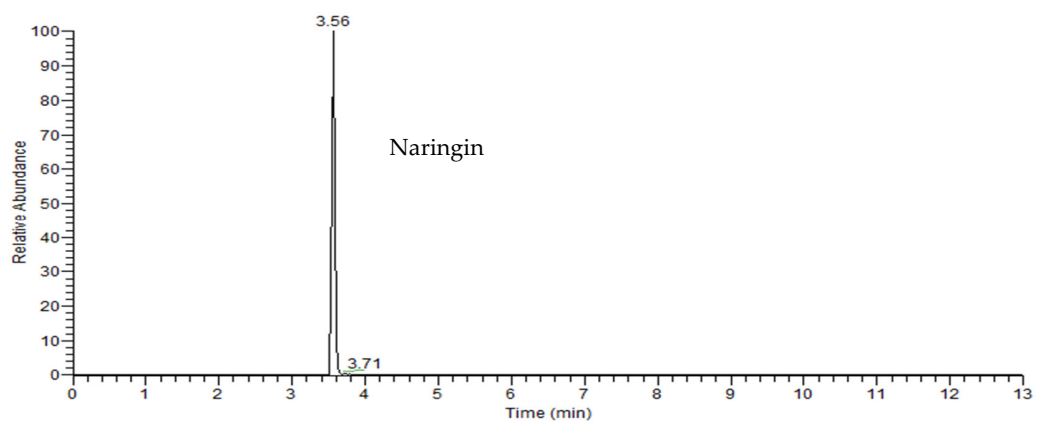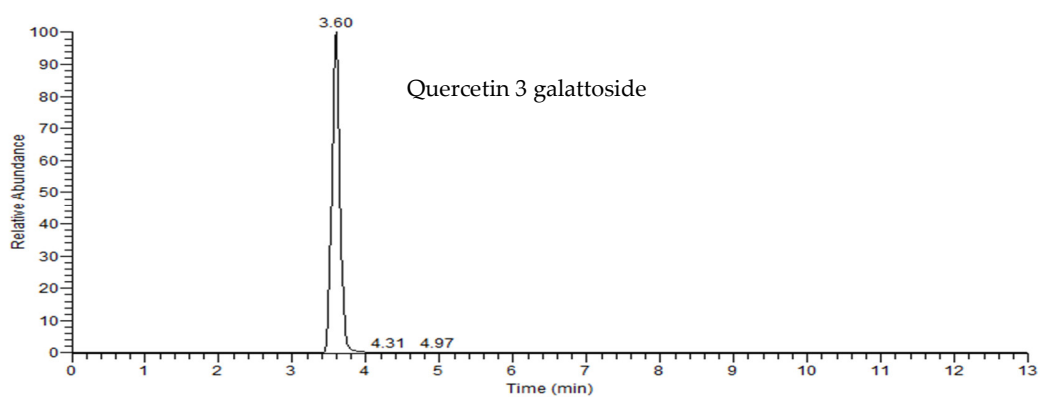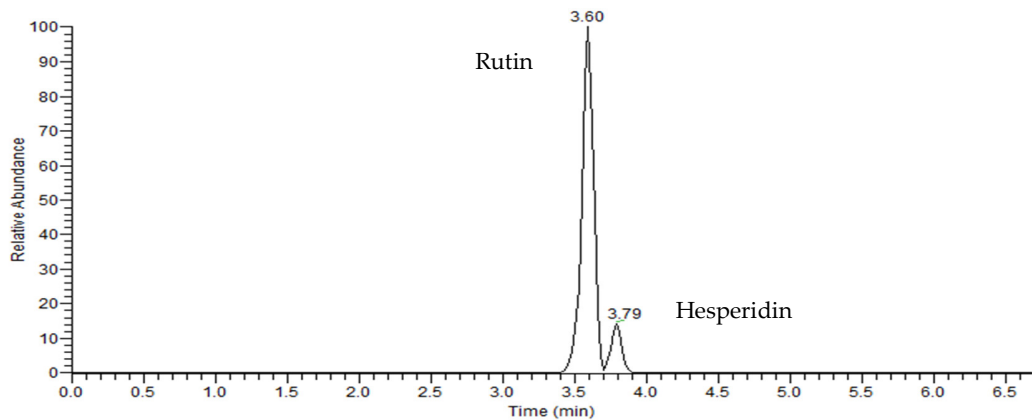

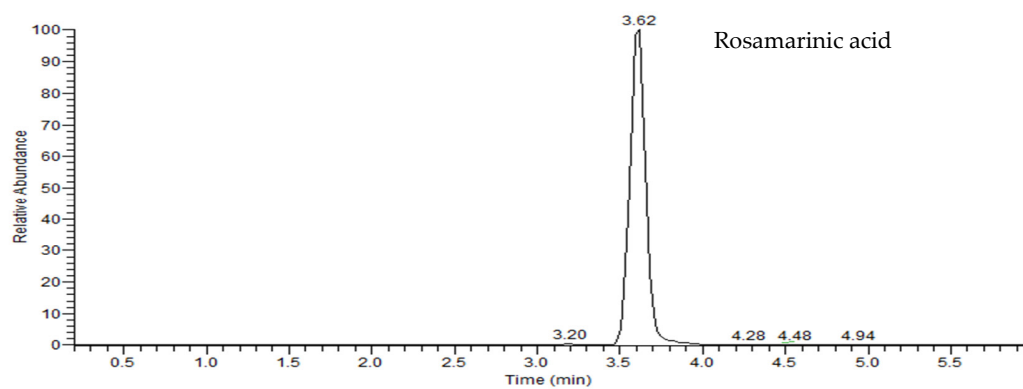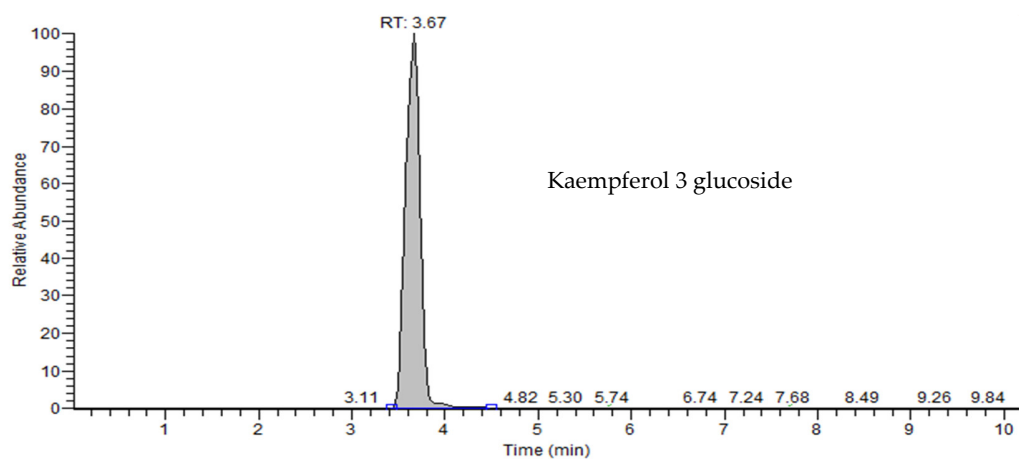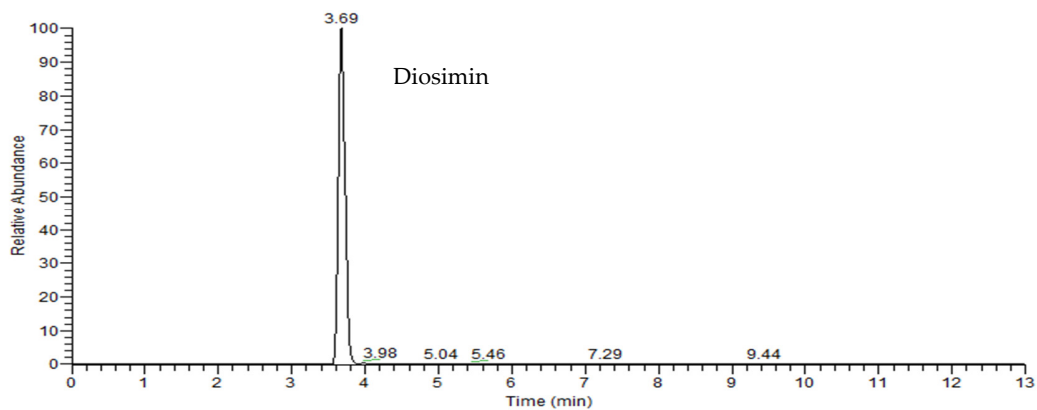

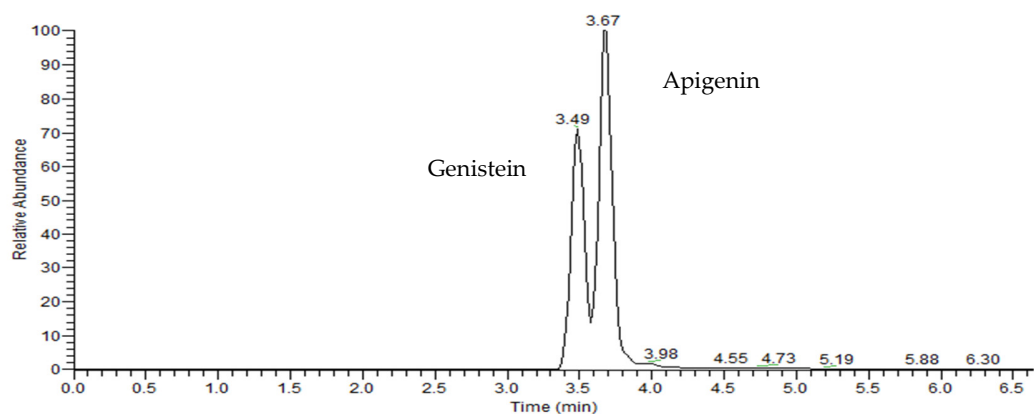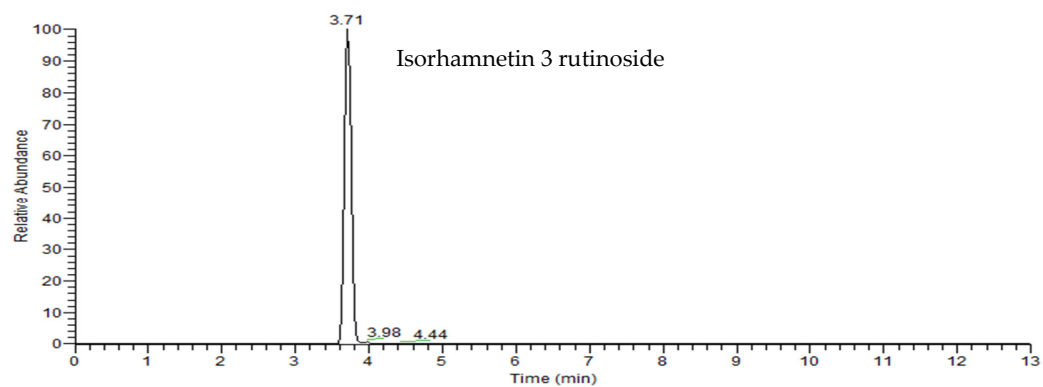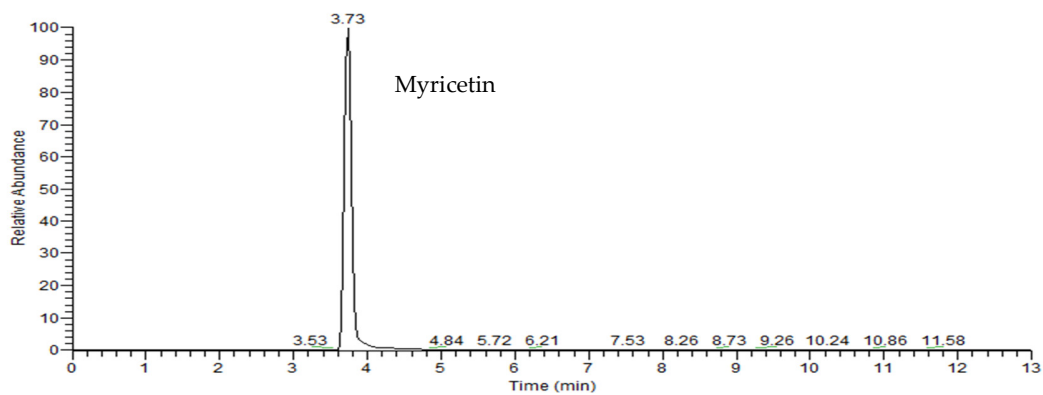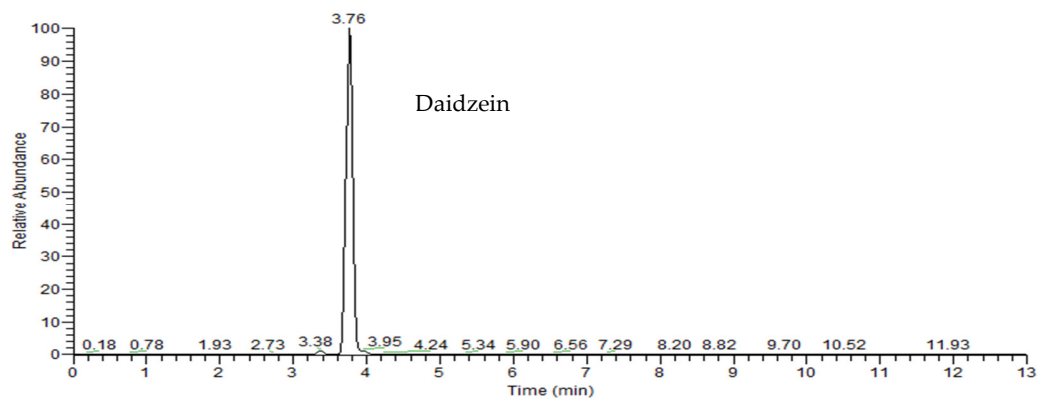

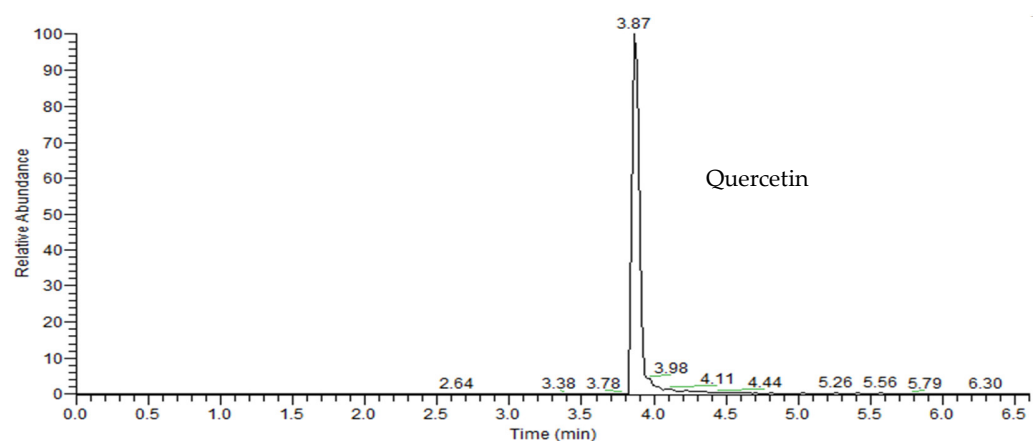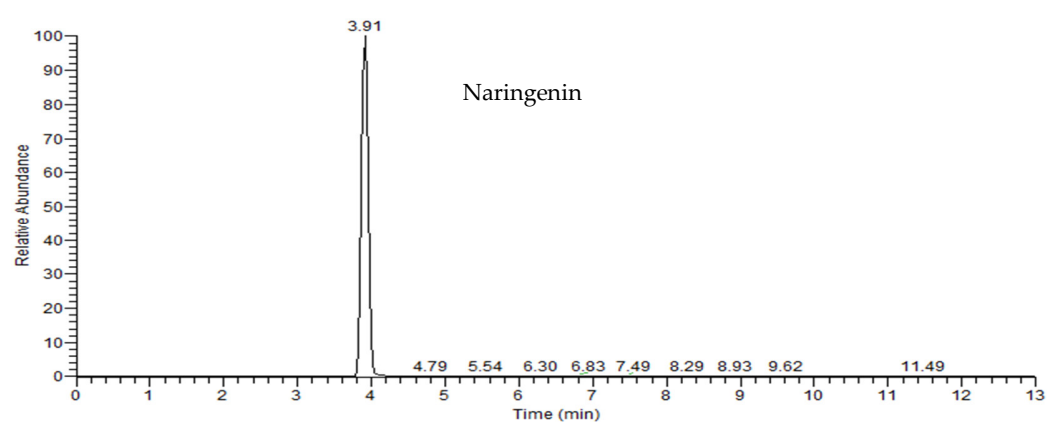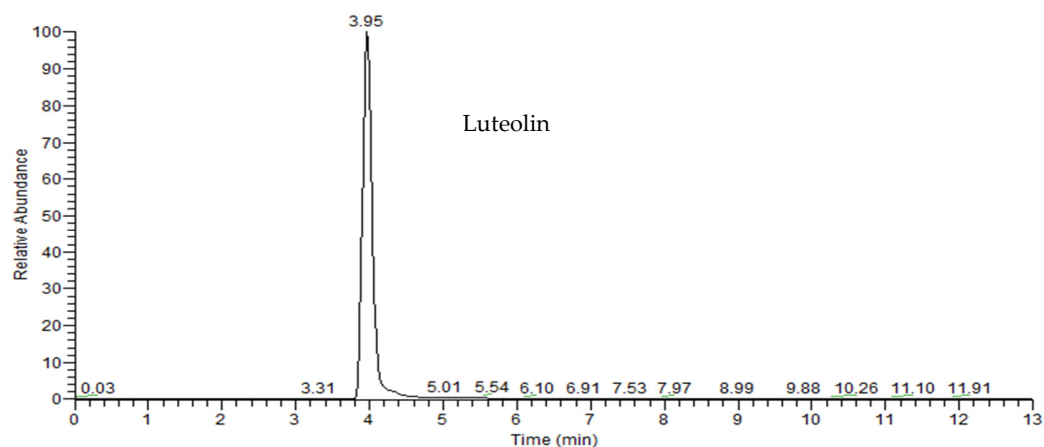

**Figure S2.** Plots of twenty-one representative extracted ion chromatograms.



**Table S2.** Total phenolic content in the CT-NARC and CT-ARC samples.

| Samples             | TPC mg GAE/g±SD |         |
|---------------------|-----------------|---------|
| Cellulose           | 0.2±0.00        |         |
|                     | CT-NARC         | CT- ARC |
| Digestion Stage     |                 |         |
| Oral stage          | N.D.            | N.D.    |
| Gastric stage       | N.D.            | N.D.    |
| Duodenal stage      | N.D.            | N.D.    |
| Pronase E           | N.D.            | N.D.    |
| Viscozyme L         | N.D.            | N.D.    |
| Total colonic stage | N.D.            | N.D.    |

Abbreviations: N.D.: not detected; CT-ARC: control acid-resistant capsules ; CT-NARC: control non-acid capsules.

**Table S3.** Bioaccessibility of polyphenolic compounds in not-encapsulated pea pods water-based extracts.

| Sample                    | TPC mg GAE/g±SD |
|---------------------------|-----------------|
| Not-encapsulated extracts |                 |
| Digestion Stage           |                 |
| Oral stage                | 1.34±0.02       |
| Gastric stage             | 1.07±0.04       |
| Duodenal stage            | 1.54±0.05       |
| Pronase E                 | 1.66±0.04       |
| Viscozyme L               | 1.48±0.06       |
| Total colonic stage       | 3.14±0.05       |

Abbreviations: mg GAE/g: milligrams of gallic acid equivalent per gram of dry extract.

**Table S4.** Antioxidant capacity of not-encapsulated extracts evaluated by FRAP, DPPH, and ABTS assays during simulated GI digestion.

| Sample                   | DPPH mmol/kg±SD | ABTS mmol/kg±SD | FRAP mmol/kg±SD |
|--------------------------|-----------------|-----------------|-----------------|
| Not-encapsulated extract |                 |                 |                 |
| <i>Digestion stage</i>   |                 |                 |                 |
| <i>Oral stage</i>        | 2.1 ± 0.1       | 1.8 ± 0.2       | 0.8 ± 0.1       |
| <i>Gastric stage</i>     | 1.6 ± 0.1       | 1.6 ± 0.2       | 0.6 ± 0.1       |
| <i>Duodenal stage</i>    | 1.7 ± 0.3       | 2..3 ± 0.2      | 1.1 ± 0.2       |
| <i>Pronase E stage</i>   | 1.8 ± 0.2       | 3.0 ± 0.2       | 1.9 ± 0.4       |
| <i>Viscozyme L stage</i> | 1.5 ± 0.1       | 1.6 ± 0.3       | 1.2 ± 0.1       |
| Total colonic stage      | 3.3 ± 0.2       | 4.6 ± 0.3       | 3.1 ± 0.3       |

**Table S5.** Correlation between TPC and data obtained by the FRAP, DPPH, and ABTS tests.

| Assay | Gastric Stage | Duodenal Stage | Pronase Stage | Viscozyme Stage |
|-------|---------------|----------------|---------------|-----------------|
|       | $R^2$         | $R^2$          | $R^2$         | $R^2$           |
| DPPH  | 0.98          | 0.98           | 0.98          | 0.97            |
| ABTS  | 0.97          | 0.98           | 0.96          | 0.98            |
| FRAP  | 0.97          | 0.97           | 0.97          | 0.97            |

The correlation coefficients were evaluated by using Pearson's method.

**Table S6.** Antioxidant activity evaluated by FRAP, DPPH, and ABTS assays in the CT-NARC and CT-ARC samples.

|                            | DPPH mmol/kg $\pm$ SD |               | ABTS mmol/kg $\pm$ SD |        | FRAP mmol/kg $\pm$ SD |               |
|----------------------------|-----------------------|---------------|-----------------------|--------|-----------------------|---------------|
| Cellulose not-digested     | 0.3 $\pm$ 0.0         |               | 0.2 $\pm$ 0.0         |        | 0.3 $\pm$ 0.0         |               |
|                            | CT-NAR                | CT- AR        | CT-NAR                | CT- AR | CT-NAR                | CT- AR        |
| <i>Digestion stage</i>     |                       |               |                       |        |                       |               |
| Oral stage                 | N.D.                  | N.D.          | N.D.                  | N.D.   | N.D.                  | N.D.          |
| Gastric stage              | N.D.                  | N.D.          | N.D.                  | N.D.   | N.D.                  | N.D.          |
| Duodenal stage             | 0.1 $\pm$ 0.0         | N.D.          | 0.1 $\pm$ 0.0         | N.D.   | N.D.                  | N.D.          |
| Pronase E stage            | N.D.                  | 0.1 $\pm$ 0.0 | N.D.                  | N.D.   | 0.1 $\pm$ 0.0         | 0.1 $\pm$ 0.0 |
| Viscozyme L stage          | N.D.                  | n.d.          | N.D.                  | N.D.   | N.D.                  | N.D.          |
| <i>Total colonic stage</i> | N.D.                  | 0.1 $\pm$ 0.0 | N.D.                  | N.D.   | 0.1 $\pm$ 0.0         | 0.1 $\pm$ 0.0 |

Abbreviations: N.D.: not detected; CT-ARC: control acid-resistant capsules ; CT-NARC: control non-acid capsules.
